# Supplementary material for: Pinocembrin suppresses oxidized low-density lipoprotein-triggered NLRP3 inflammasome/GSDMD-mediated endothelial cell pyroptosis through an Nrf2-dependent signaling pathway
Source: PubMed Central journal article supplement (PMC9381505; doi:10.1038/s41598-022-18297-3), 2022-08-16

**Pinocembrin suppresses oxidized low-density lipoprotein-triggered NLRP3  
inflammasome/GSDMD-mediated endothelial cell pyroptosis through an  
Nrf2-dependent signaling pathway**

Tong Wang<sup>1§</sup>, Hua Tian<sup>2,3§</sup>✉, Tianqi Pan<sup>4</sup>, Shutong Yao<sup>4</sup>, Huayun Yu<sup>2</sup>, Yumei Wu<sup>5</sup> &  
Shijun Wang<sup>2</sup>✉

<sup>1</sup> College of nursing, Shandong University of Traditional Chinese Medicine, Jinan 250355, Shandong, China.

<sup>2</sup> College of Traditional Chinese Medicine, Shandong University of Traditional Chinese Medicine, Jinan 250355, Shandong, China.

<sup>3</sup> Key Laboratory of Atherosclerosis in Universities of Shandong and Institute of Atherosclerosis, Shandong First Medical University & Shandong Academy of Medical Sciences, Taian 271000, Shandong, China.

<sup>4</sup> College of Basic Medical Sciences, Shandong First Medical University & Shandong Academy of Medical Sciences, Taian 271000, Shandong, China.

<sup>5</sup> Pharmacy Department, Dongying district hospital of Traditional Chinese Medicine, Dongying 257000, Shandong, China.

§ Equal contribution to this study

✉ To whom correspondence should be addressed:

<sup>1</sup> Shijun Wang, Email: wsj@sducm.edu.cn, <sup>2</sup> Hua Tian, Email:liutianfangyu@163.com, College of Traditional Chinese Medicine, Shandong University of Traditional Chinese Medicine, No.4655 Daxue Road, Changqing District, Jinan 250355, Shandong, China. Tel.: +86 0531 89628750; Fax: +86 0531 89628077.

Figure 1C

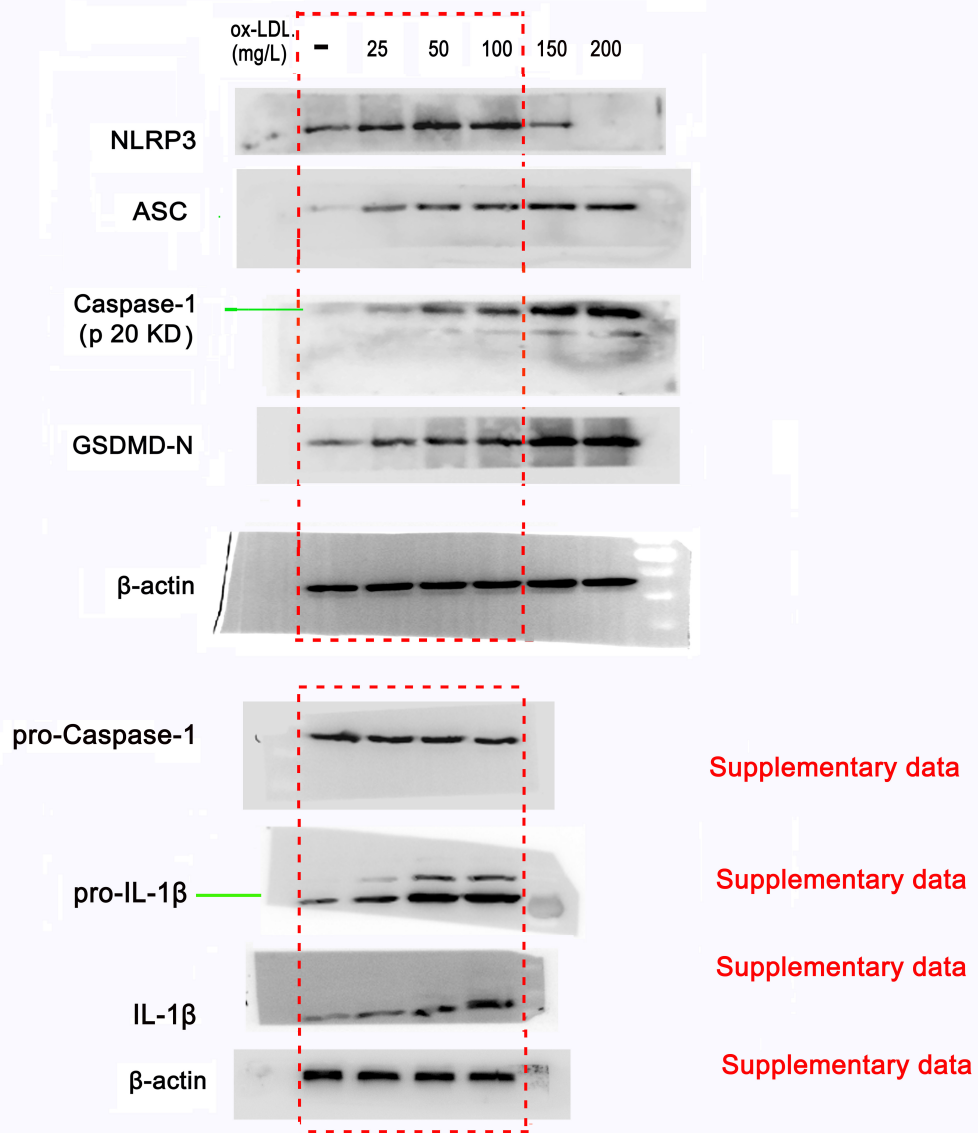

Figure 3 a

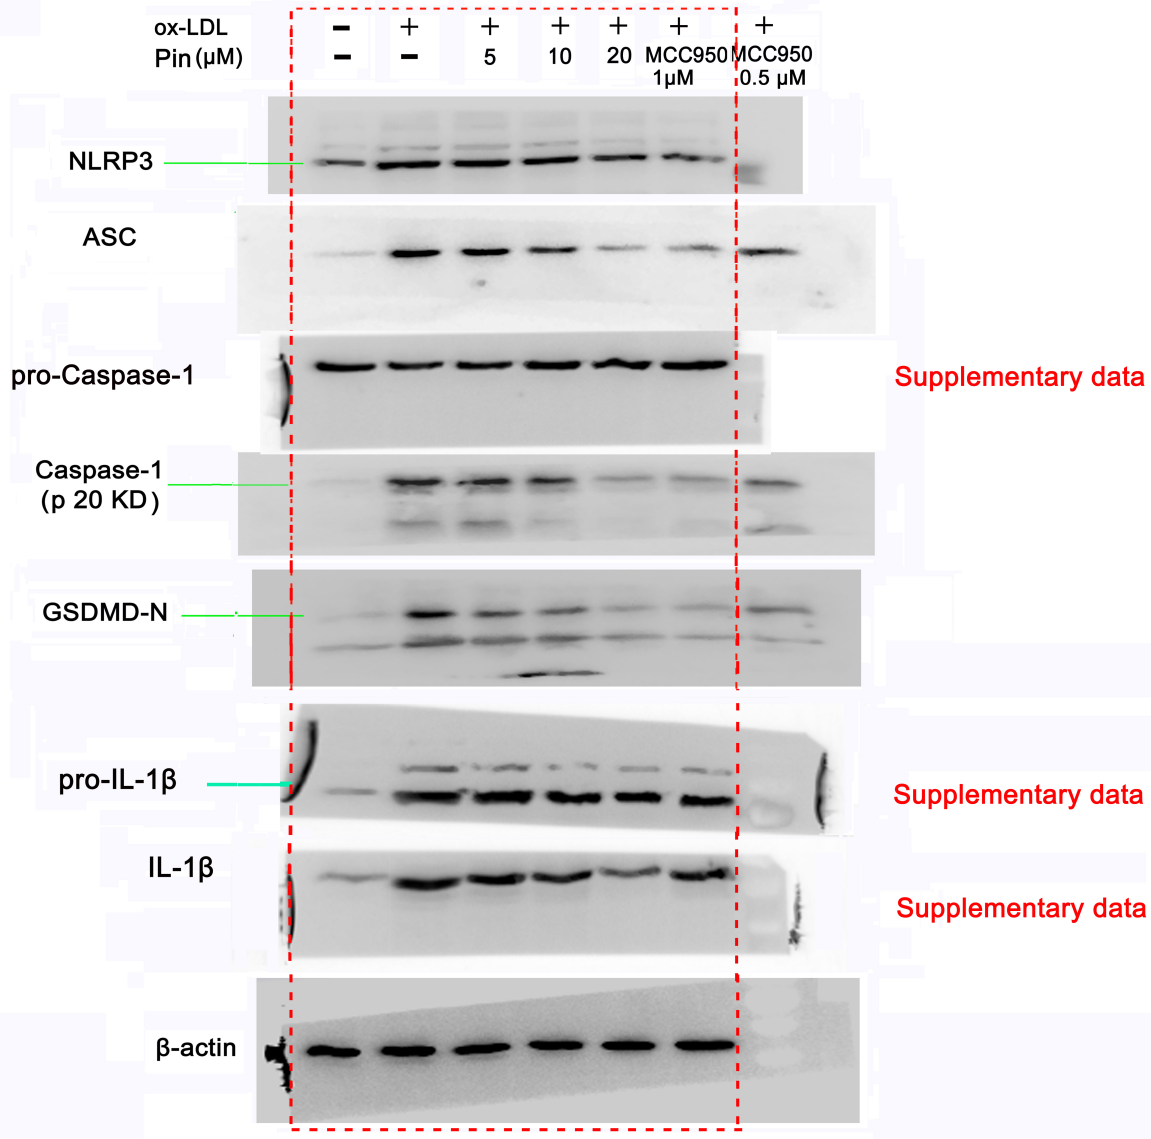

Figure 4 a

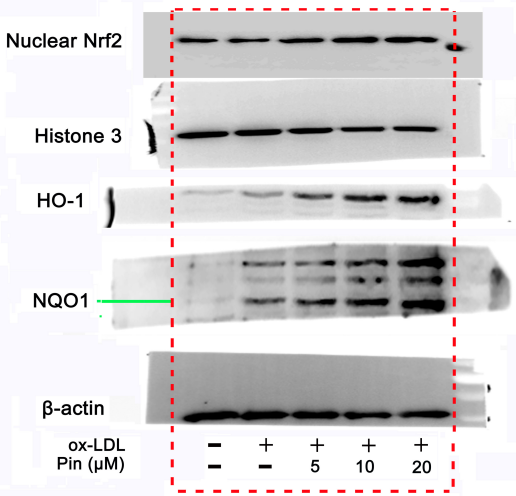

Figure 4 c

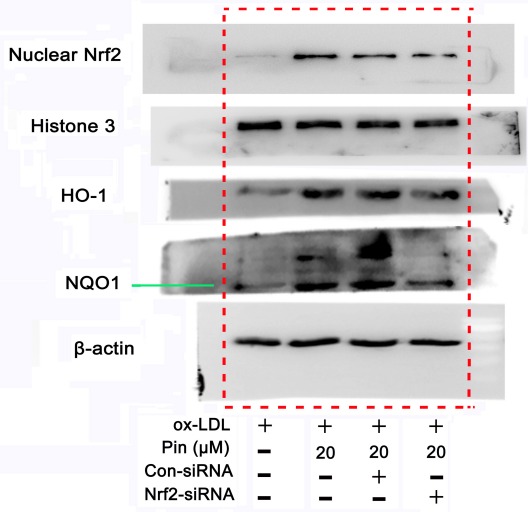

Figure 6 b

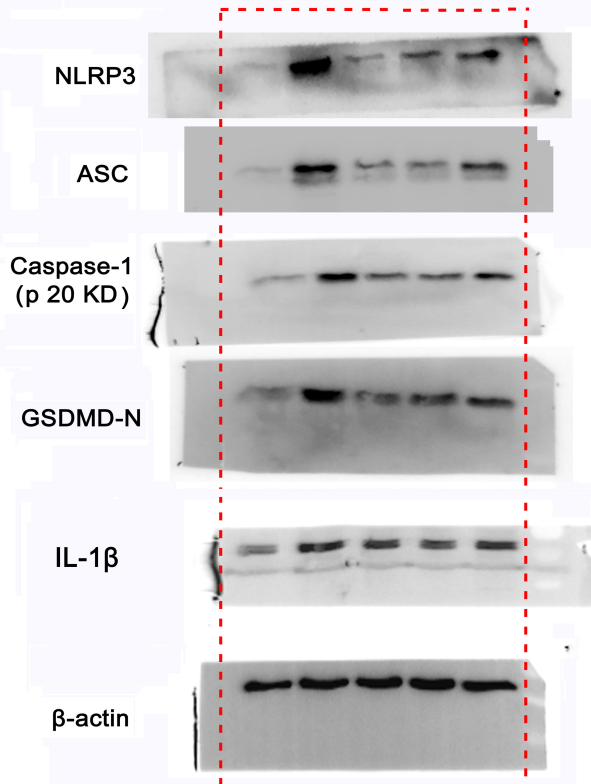

Supplementary data

|                |   |   |    |    |    |
|----------------|---|---|----|----|----|
| ox-LDL         | - | + | +  | +  | +  |
| Pin ( $\mu$ M) | - | - | 20 | 20 | 20 |
| Con-siRNA      | - | - | -  | +  | -  |
| Nrf2-siRNA     | - | - | -  | -  | +  |

Figure 8 d

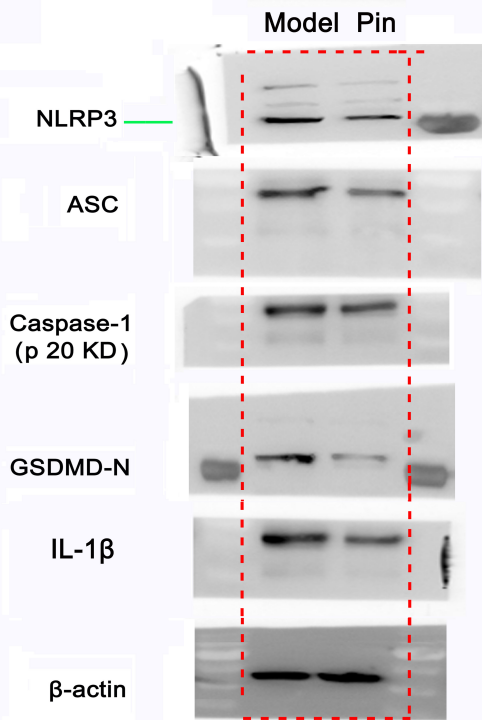

Figure 8 e

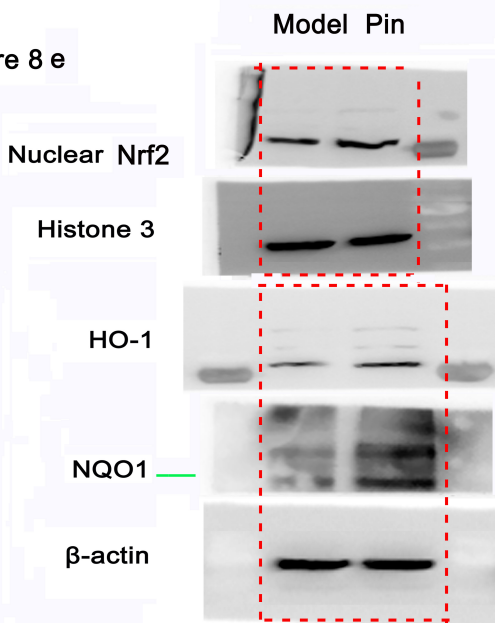

Supplement: 41598_2022_18297_MOESM1_ESM.pdf [file 41598_2022_18297_MOESM1_ESM.pdf]
